# Supplementary material
Source: PubMed Central journal article supplement (PMC4135425)
Supplement: NIHMS60005-supplement-Suppl.pdf [file NIHMS60005-supplement-Suppl.pdf]

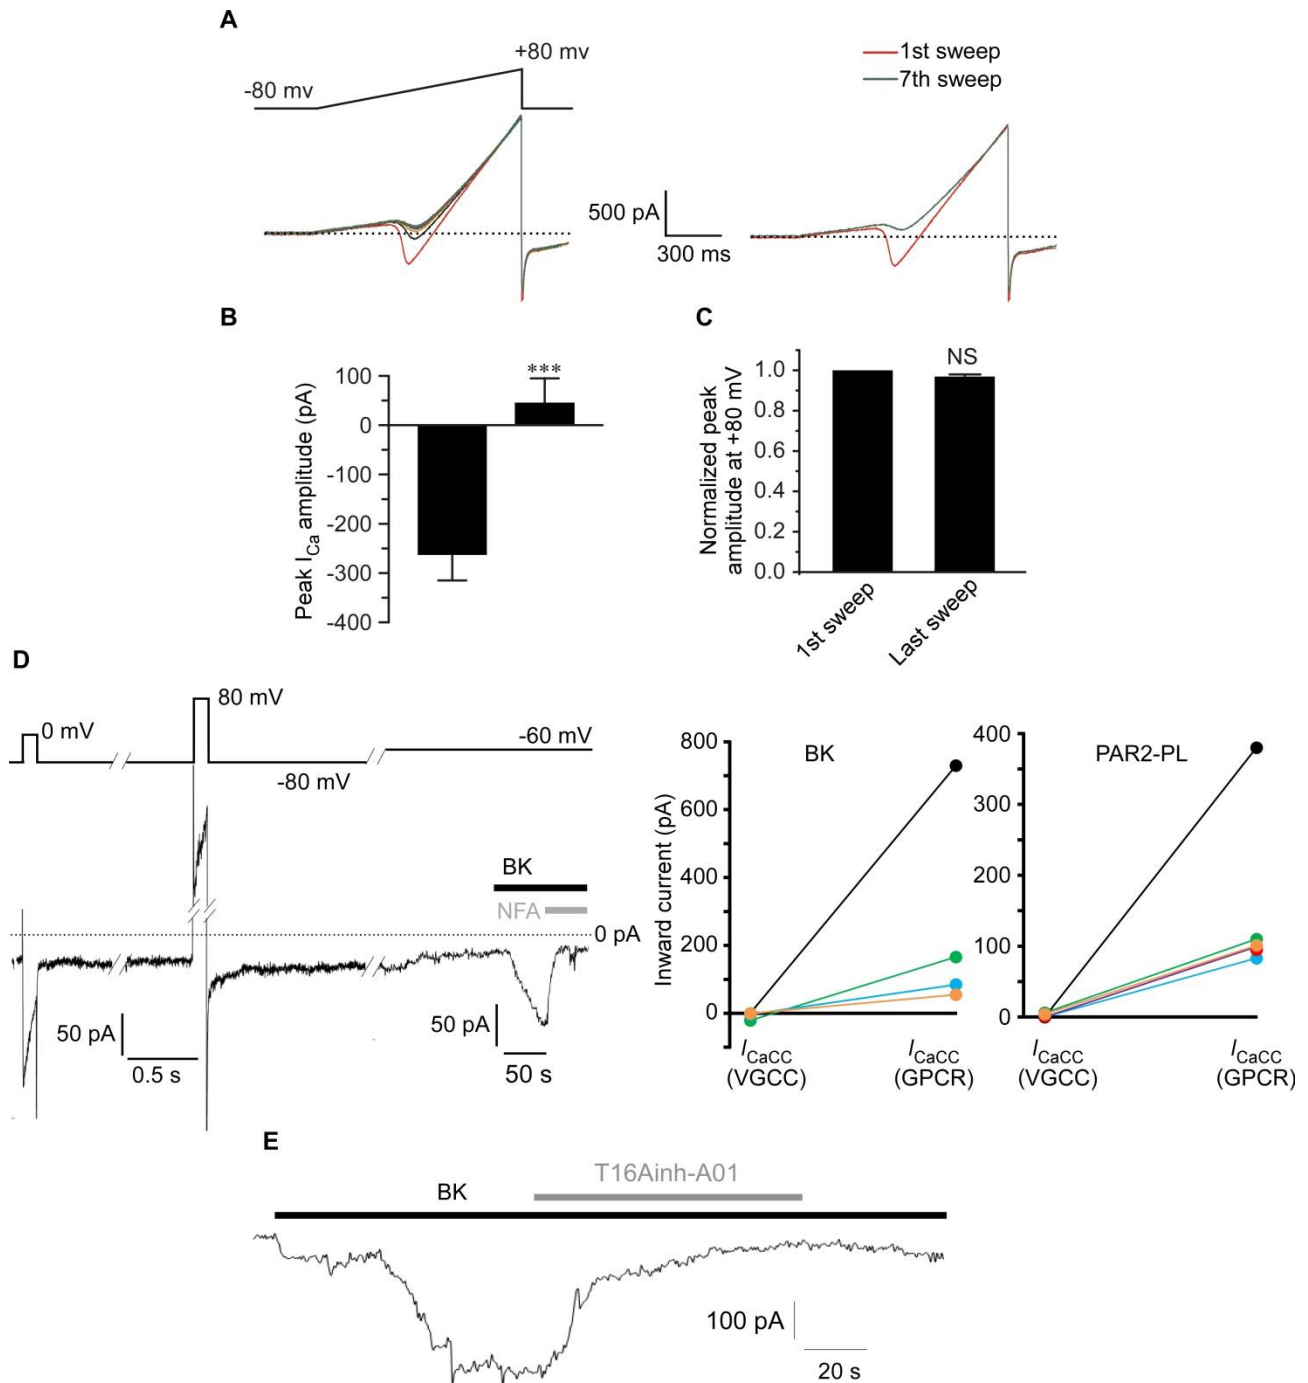

**Fig. S1. CaCC in small DRG neurons is not activated by VGCC.** (A) Voltage ramps (depicted above current traces on the left) from -80 to +80 mV were used to activate VGCC (downward ‘hump’ in current traces) and to test if outward current at +80 mV is CaCC. The interval between the sweeps was set at 1 s to cause rapid use-dependent inactivation of VGCC. At these recording conditions VGCC current was inhibited by 5<sup>th</sup>-7<sup>th</sup> sweep (green trace) but this did not affect the amplitude of outward current at +80 mV. (B, C) Summary of the difference in the amplitude of peak VGCC current (B) and the outward current at +80 mV (C) between the first and the last sweeps ( $n = 10$ ). (D) Left: Representative current trace testing the CaCC stimulation by VGCC and GPCR ligand on the same DRG neuron. Right: Scatter plots of experiments as on the left. Amplitudes of VGCC-coupled tail currents [ $I_{CaCC}$ (VGCC)] and GPCR-induced inward currents [ $I_{CaCC}$ (GPCR)] recorded from the same neuron are connected. PAR2-PL (10  $\mu$ M) and BK (1  $\mu$ M) induced inward current of  $145 \pm 47$  pA ( $n=6$ ) and  $259 \pm 158$  pA ( $n=4$ ), respectively. (E) Inhibition of the BK-induced inward current in a small DRG neuron by the selective TMEM16A inhibitor, T16Ainh-A01 (50  $\mu$ M). Example represents 6 experiments in which T16Ainh-A01 inhibited BK-induced CaCC by  $88 \pm 6\%$ .

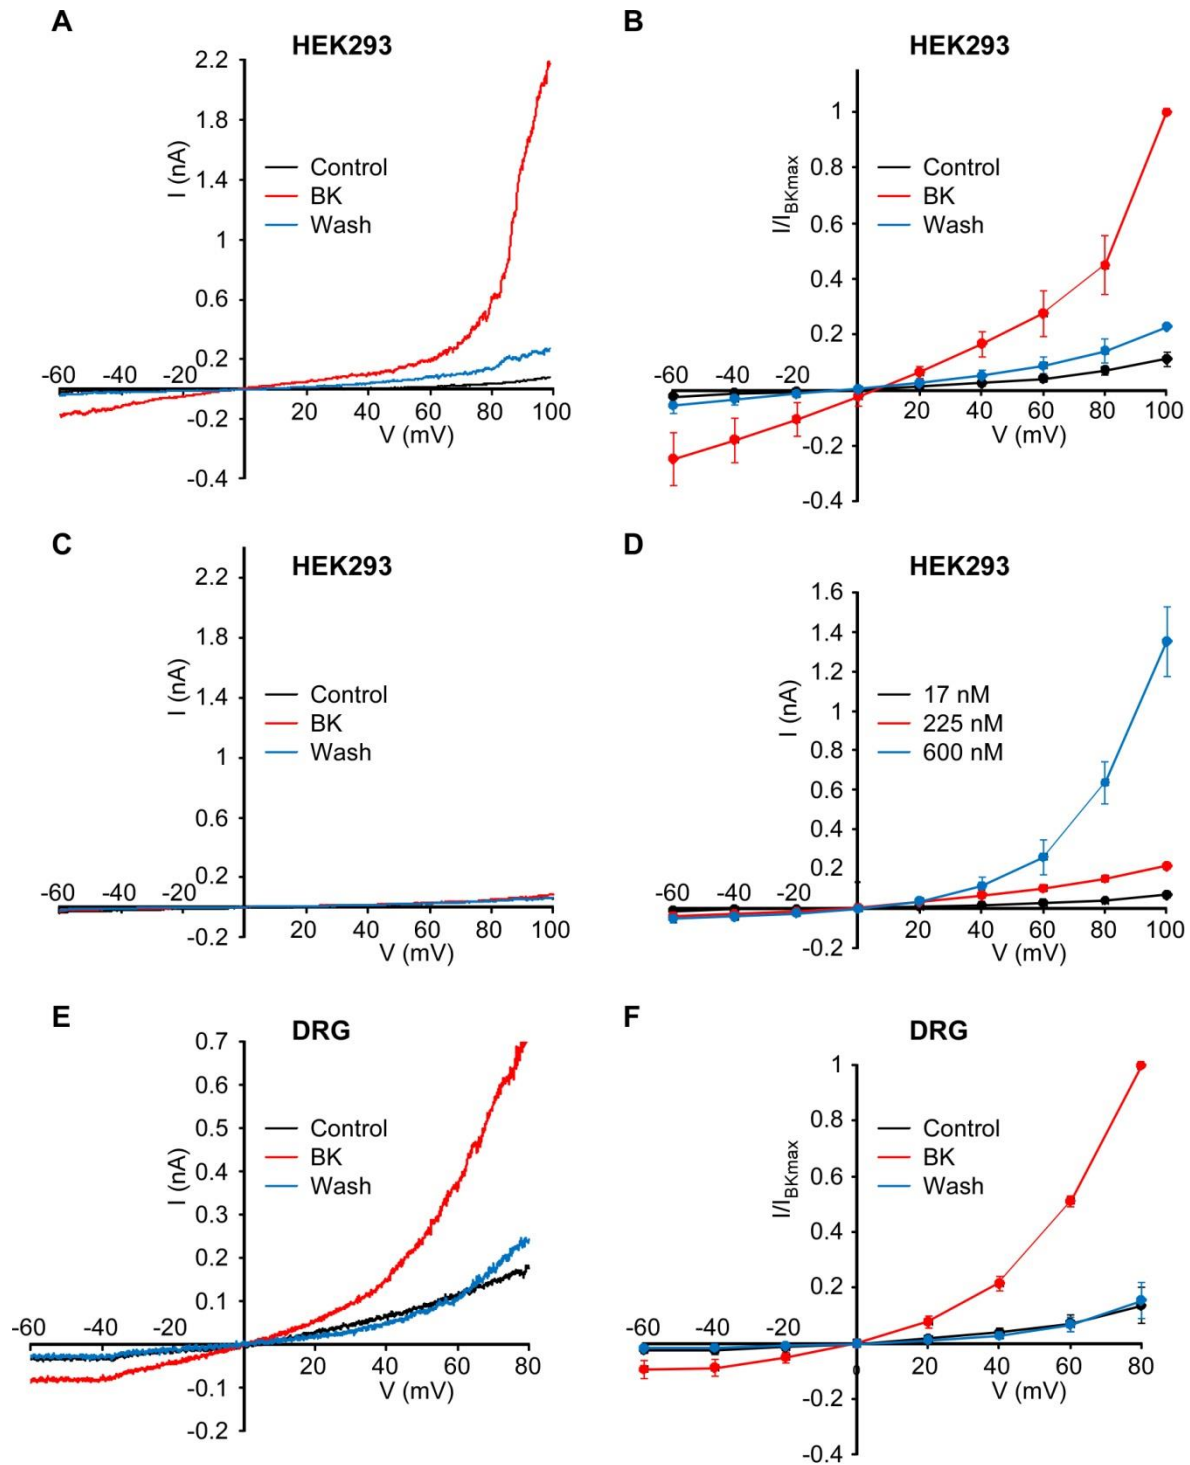

**Fig. S2. Properties of BK-induced CaCC in HEK293 cells overexpressing ANO1 and B<sub>2</sub>R and in cultured small DRG neurons.** (A) Exemplary current traces recorded in whole cell patch clamp by the voltage ramps from -60 to 100 mV in HEK293 cell line stably expressing ANO1 and transiently transfected with the B<sub>2</sub>R. (B) Average current-voltage relationships for 5 experiments as (A). (C) Exemplary current traces recorded from HEK293 cells overexpressing B<sub>2</sub>R only. (D) Average current-voltage relationships for 5 experiments as in (A). (E) Activation of ANO1 in HEK293 cells by dialysis of Ca<sup>2+</sup> through the whole-cell patch pipette (concentrations of free Ca<sup>2+</sup> are as indicated, n=4). (E-F) Recordings of BK-induced CaCC from cultured DRG neurons; similar to (A) and (B) but recorded by a voltage ramps from -60 to 80 mV from cultured small DRG neurons, n=5. Exemplary traces are shown in (E) and average current-voltage relationships are shown in (F). 1  $\mu$ M of BK was used throughout.

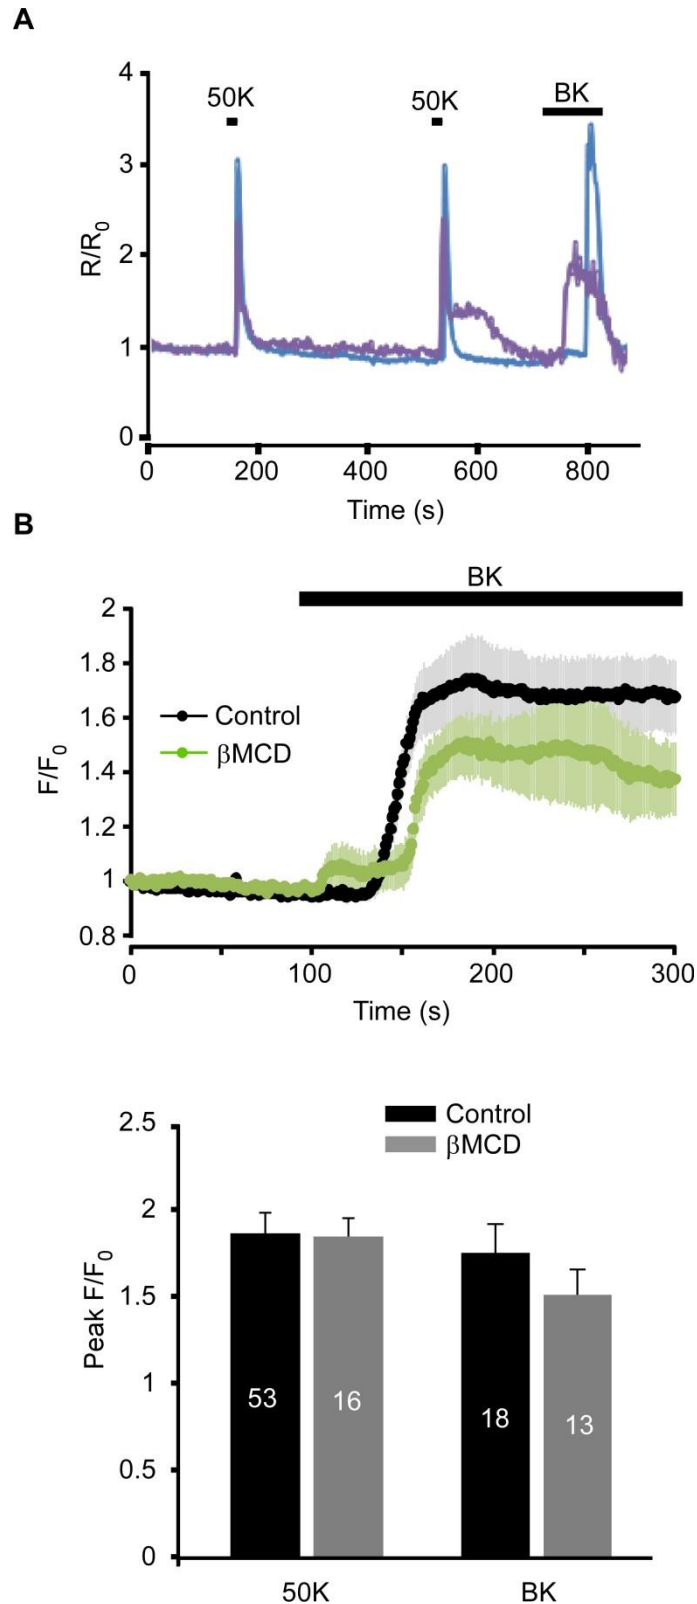

**Fig. S3. Lipid raft disruption with  $\beta$ MCD does not significantly affect BK- or depolarization-induced  $\text{Ca}^{2+}$  transients in DRG.** (A) Examples of BK- and depolarization- (50 mM KCl) induced  $\text{Ca}^{2+}$  transients in small DRG neurons measured with fura-2 ratiometric  $\text{Ca}^{2+}$  imaging. (B) Fluo-4  $\text{Ca}^{2+}$  imaging was performed to evaluate the effect of  $\beta$ MCD (10 mM, 45 minutes incubation during the loading with fluo-4 AM) on the BK-induced  $\text{Ca}^{2+}$  responses. Shown are mean values (sphere symbols)  $\pm$  standard error of mean (shaded area) for the pulled time-courses of the fluo-4 fluorescence of 18/31 control and 13/31  $\beta$ MCD-treated neurons that responded to 250 nM BK. The bar graph below is a summary of the  $\beta$ MCD effect on peak  $\text{Ca}^{2+}$  transients induced by 50 mM KCl and BK (number of neurons is indicated within the bars).

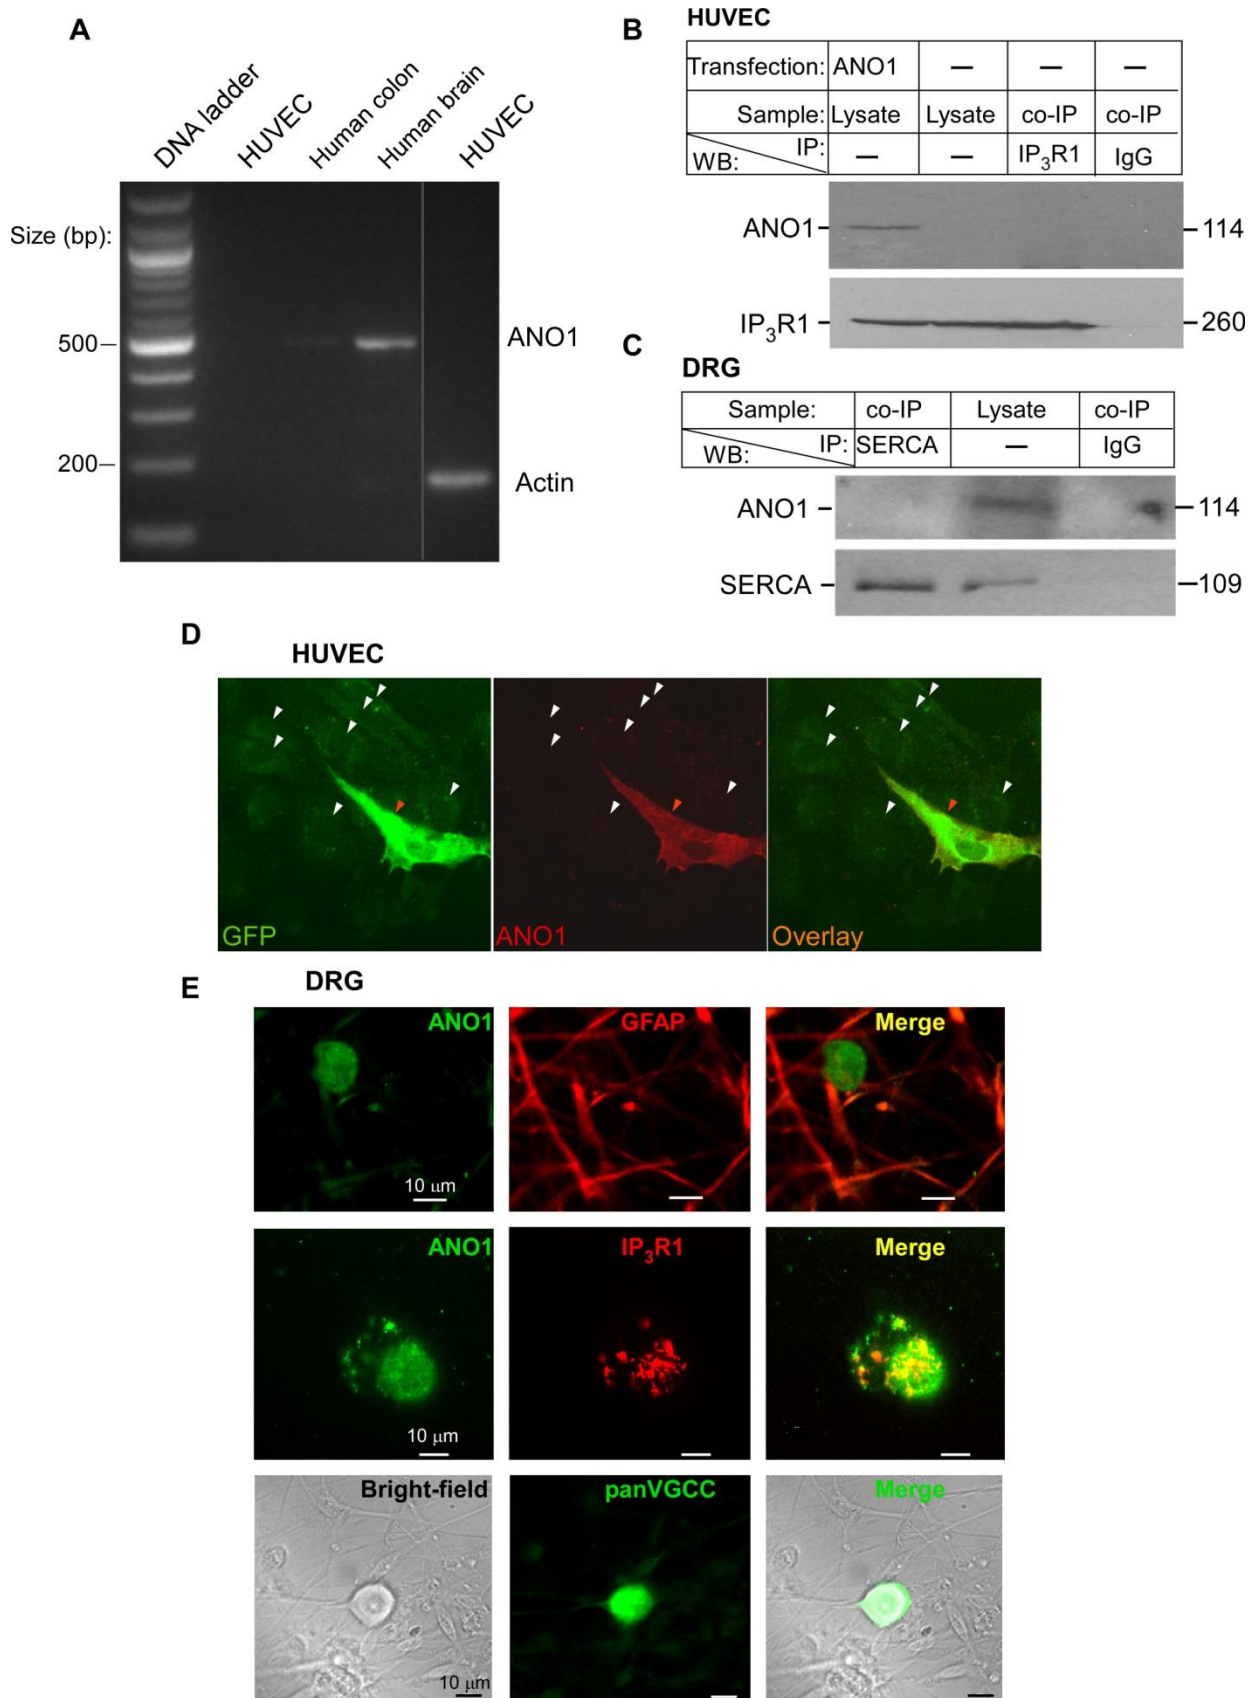

**Fig. S4. Antibody specificity experiments.** (A) RT-PCR revealed no detectable expression of ANO1 in HUVECs while ANO1 specific products were detected in human colon and brain. Forward primer: GTAATACGGCAATAAGGTAGC; reverse primer: ACAACTCTGAGGTCGG. Beta-actin was detected in the HUVEC sample as a positive control. (B) Detection of ANO1 immunoreactivity in HUVECs transfected with *Ano1* cDNA (left lane) by Western blot. No immunoreactivity was detected in nontransfected HUVECs (middle-left); no immunoprecipitation of ANO1 by the IP<sub>3</sub>R1 antibody or IgG is detected in nontransfected HUVECs. (C) Antibody against sarco-endoplasmic calcium ATPase (SERCA) failed to immunoprecipitate

ANO1 from DRG. **(D)** ANO1 antibody specifically labelled cultured HUVECs co-transfected with ANO1 and GFP (orange arrow) but not the nontransfected cells (white arrows). **(E)** Top row: ANO1 antibody specifically labelled small DRG neuron but not glia (as labelled with antibody against GFAP). Middle row: IP<sub>3</sub>R1 antibody labelled reticular structures in the ANO1-positive DRG neuron cell body. Bottom row: pan-VGCC antibody labelled DRG neuron but not glia (visible using bright-field illumination).
